# Supplementary material for: Diverse genetic architectures lead to the same cryptic phenotype in a yeast cross
Source: PubMed Central journal article supplement (PMC4895441; doi:10.1038/ncomms11669), 2016-06-01
Supplement: ncomms11669-s1.pdf [file ncomms11669-s1.pdf]

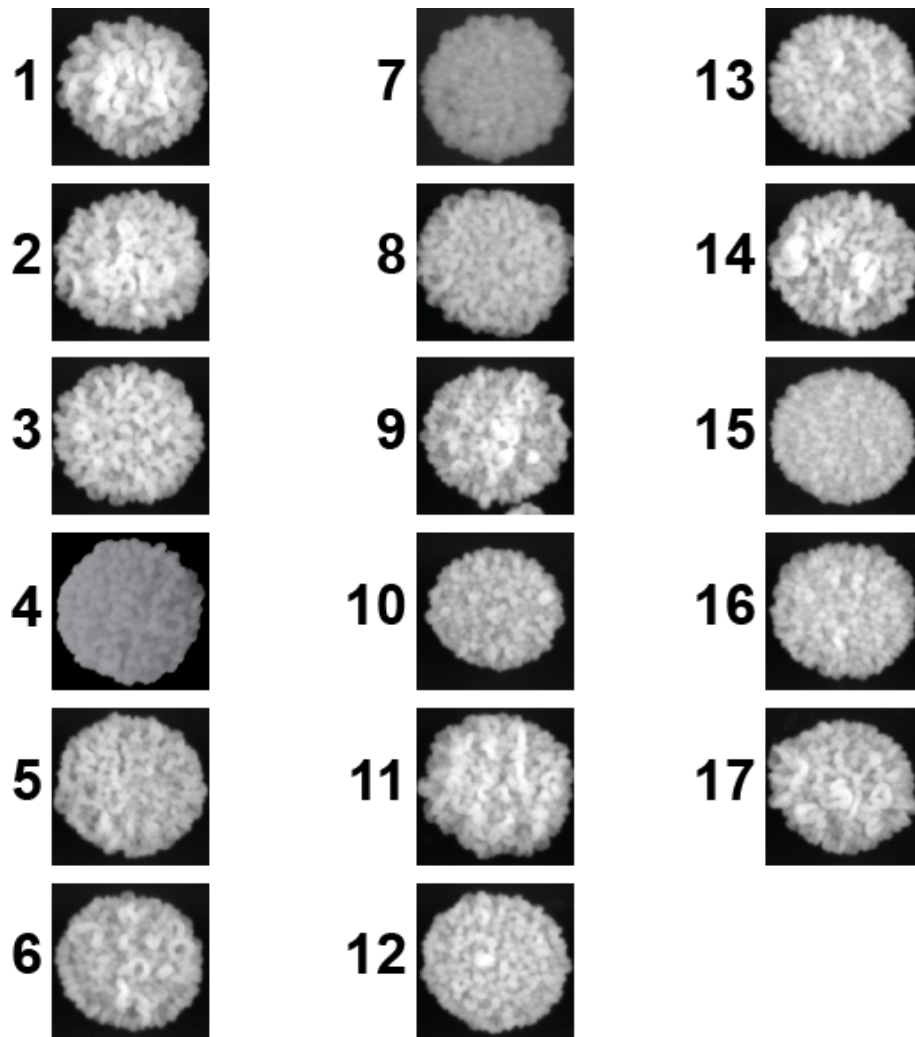

**Supplementary Figure 1. Phenotypes of the 17 identified rough segregants at 21°C.**

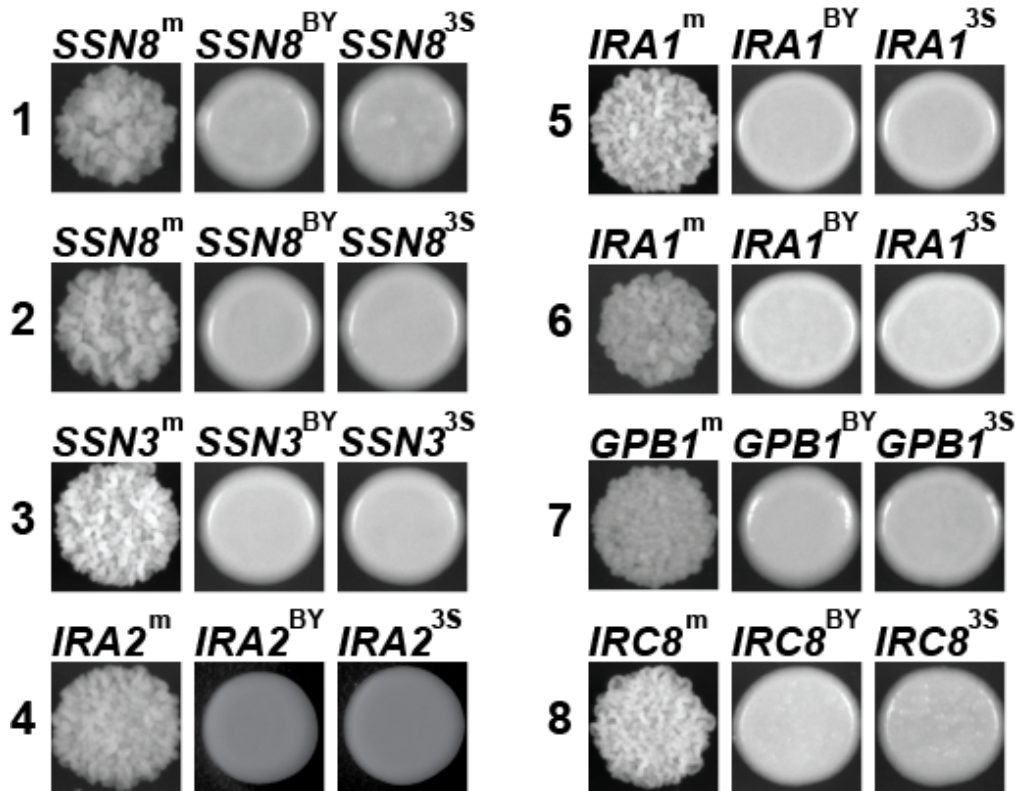

**Supplementary Figure 2. Verification that identified *de novo* mutations have phenotypic effects in rough segregants 1 through 8.** Allele replacements were performed in the rough segregant in which a *de novo* mutation was detected. For a gene harboring a *de novo* mutation in a given rough segregant, we performed three genetic engineerings. The mutant allele was replaced with itself, the wild type BY allele, and the wild type 3S allele. These replacements are referred to in superscript as 'm', 'BY', and '3S', respectively. For each of the eight *de novo* mutations, replacement of the lesion with wild type BY or 3S alleles resulted in a conversion from rough to smooth colony morphology. This implies that the *de novo* mutations play causal roles in a given individual's expression of the rough phenotype.

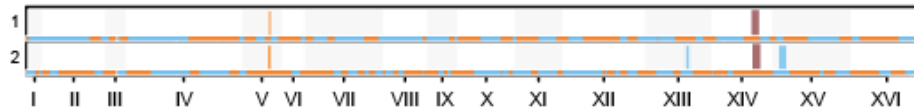

**Supplementary Figure 3. Rough segregants 1 and 2 possess the same *SSN8* lesion, but are likely distinct individuals obtained from different matings of BY and 3S.** Genome-wide haplotypes are shown below mapping data from Fig. 2a. Blue horizontal bars represent regions in which the segregant possessed the BY allele and orange horizontal bars represent regions in which the segregant possessed the 3S allele. The red vertical bars indicate the *SSN8* mutations. As can be seen from their haplotypes, rough segregants 1 and 2 do not share any recombination breakpoints, indicating they are not spores from the same tetrad. Because each rough segregant was obtained from independent matings of BY and 3S, it is unlikely that these individuals' *SSN8* lesions arose in the same mutational event.

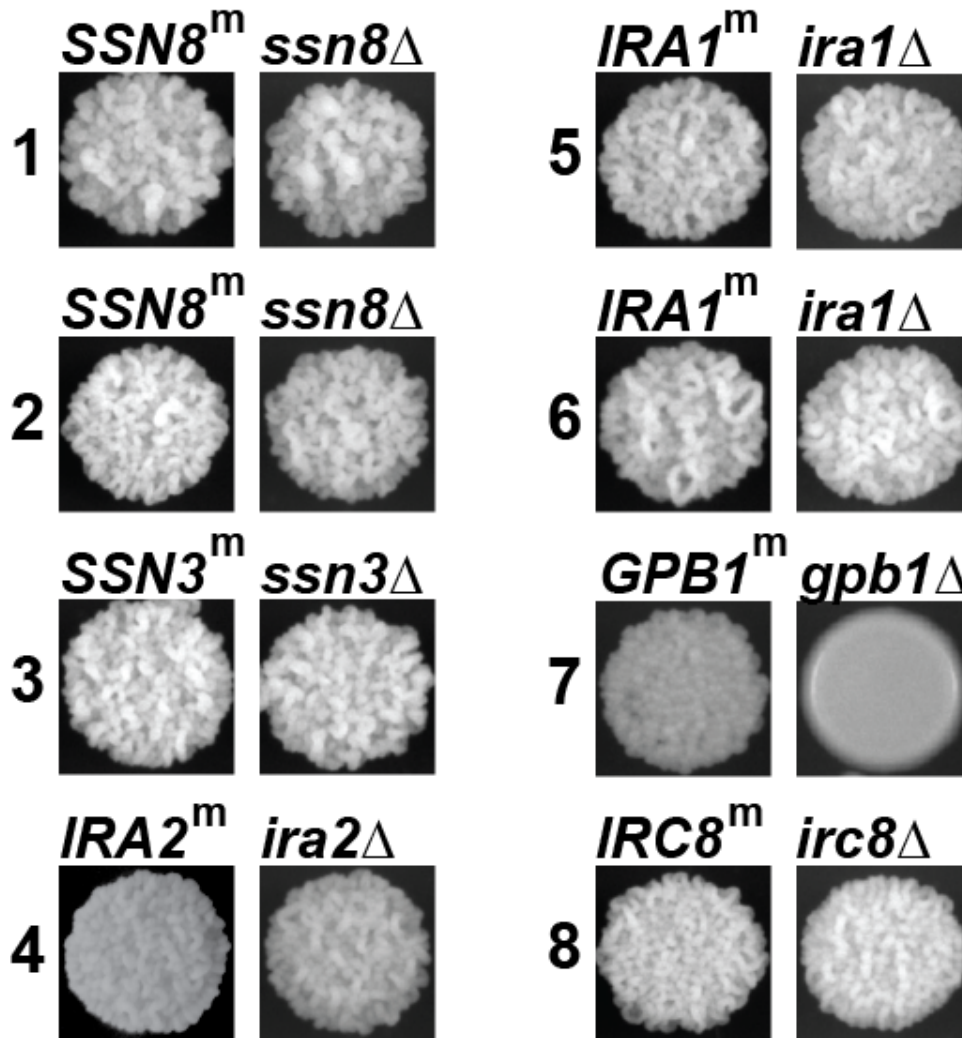

**Supplementary Figure 4. Complete deletion of mutated genes from rough segregants 1 through 8.** To test whether the identified *de novo* mutations were null or partial loss-of-function alleles, we deleted these genes in their entirety from the corresponding rough segregant. Lack of effect of these complete deletions on colony morphology indicates that a given *de novo* mutation is likely a null allele. In contrast, a conversion from rough to smooth colony morphology suggests that a particular *de novo* mutation is a partial loss-of-function allele.

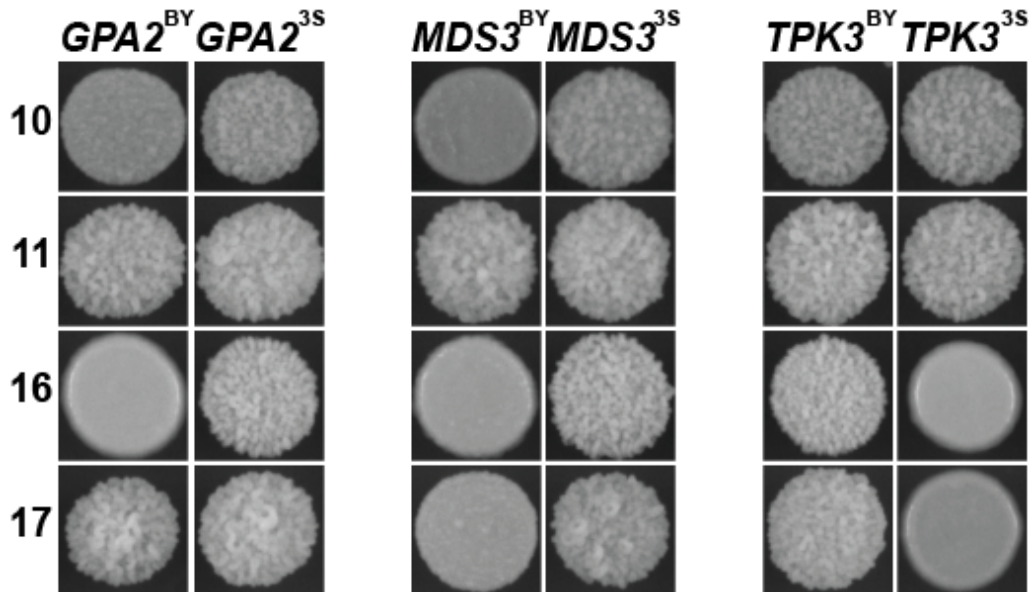

**Supplementary Figure 5. Allele replacements verify that *GPA2*<sup>3S</sup>, *MDS3*<sup>3S</sup>, and *TPK3*<sup>BY</sup> harbor cryptic variants with genetic background-dependent effects.** We replaced the causal allele of a given gene with the alternative allele in four different rough segregants. As a control, causal alleles were also replaced with themselves. Representative allele replacement results are shown for each allele replacement experiment in each rough segregant. Please note that the pictures are ordered so that allele replacements involving the BY and 3S alleles are always shown to the left and right, respectively.

**Supplementary Table 1. Number of individuals in each pooled sequencing experiment.**

|         |    |
|---------|----|
| RS1xBY  | 92 |
| RS1x3S  | 95 |
| RS2xBY  | 84 |
| RS2x3S  | 83 |
| RS3xBY  | 82 |
| RS3x3S  | 92 |
| RS4xBY  | 95 |
| RS4x3S  | 86 |
| RS5xBY  | 93 |
| RS5x3S  | 90 |
| RS6xBY  | 85 |
| RS6x3S  | 89 |
| RS7xBY  | 84 |
| RS7x3S  | 48 |
| RS8xBY  | 92 |
| RS8x3S  | 52 |
| RS9xBY  | 69 |
| RS9x3S  | 69 |
| RS10xBY | 89 |
| RS10x3S | 68 |
| RS11xBY | 86 |
| RS11x3S | 74 |
| RS12xBY | 90 |
| RS12x3S | 53 |
| RS13xBY | 88 |
| RS13x3S | 72 |
| RS14xBY | 90 |
| RS14x3S | 74 |
| RS15xBY | 69 |
| RS15x3S | 46 |
| RS16xBY | 70 |
| RS16x3S | 50 |
| RS17xBY | 48 |
| RS17x3S | 70 |

**Supplementary Table 2. Loci detected in rough backcross pools.** Start and stop positions were called as the 90% confidence interval around the point of maximum significance. Allele frequencies were calculated as the maximum within a 25-SNP window within a locus.

| Segregant | Cross | Chromosome | Start   | Stop    | Frequency |
|-----------|-------|------------|---------|---------|-----------|
| 1         | 3S    | 3          | 157990  | 235590  | 0.99      |
| 1         | 3S    | 5          | 6639    | 64439   | 1.00      |
| 1         | BY    | 5          | 349582  | 413382  | 0.99      |
| 1         | BY    | 14         | 458048  | 649748  | 1.00      |
| 2         | BY    | 3          | 91793   | 147893  | 0.84      |
| 2         | 3S    | 3          | 175351  | 212951  | 0.99      |
| 2         | 3S    | 5          | 6639    | 89139   | 1.00      |
| 2         | BY    | 5          | 337336  | 461436  | 0.99      |
| 2         | 3S    | 13         | 547996  | 652396  | 0.87      |
| 2         | BY    | 14         | 504670  | 686470  | 1.00      |
| 3         | 3S    | 3          | 78378   | 217178  | 0.99      |
| 3         | BY    | 4          | 1172541 | 1220841 | 0.85      |
| 3         | 3S    | 5          | 5035    | 352535  | 1.00      |
| 3         | BY    | 5          | 353654  | 460054  | 1.00      |
| 3         | BY    | 14         | 441083  | 488583  | 0.86      |
| 3         | 3S    | 16         | 427572  | 563072  | 1.00      |
| 4         | 3S    | 3          | 90850   | 228750  | 1.00      |
| 4         | BY    | 4          | 1173122 | 1259022 | 0.87      |
| 4         | 3S    | 5          | 1435    | 79335   | 0.99      |
| 4         | BY    | 5          | 277713  | 497113  | 1.00      |
| 4         | 3S    | 13         | 514890  | 620490  | 0.88      |
| 4         | 3S    | 14         | 319549  | 485449  | 0.98      |
| 4         | 3S    | 15         | 88326   | 237926  | 0.99      |
| 4         | 3S    | 15         | 586426  | 733426  | 0.81      |
| 5         | 3S    | 2          | 450356  | 602056  | 1.00      |
| 5         | 3S    | 3          | 92377   | 219377  | 1.00      |
| 5         | 3S    | 5          | 6535    | 64435   | 1.00      |
| 5         | BY    | 5          | 336513  | 446913  | 1.00      |
| 5         | 3S    | 12         | 56412   | 118112  | 0.80      |
| 5         | 3S    | 13         | 510149  | 686349  | 0.96      |
| 5         | 3S    | 14         | 360204  | 480404  | 0.95      |
| 6         | BY    | 2          | 481372  | 547972  | 1.00      |
| 6         | 3S    | 2          | 548339  | 657239  | 0.82      |
| 6         | 3S    | 3          | 105147  | 207047  | 1.00      |
| 6         | 3S    | 5          | 1435    | 81635   | 1.00      |

|    |    |    |         |         |      |
|----|----|----|---------|---------|------|
| 6  | BY | 5  | 341045  | 467745  | 0.99 |
| 6  | BY | 12 | 617236  | 672536  | 0.82 |
| 6  | 3S | 13 | 534632  | 626532  | 0.88 |
| 6  | 3S | 14 | 350144  | 570944  | 0.90 |
| 6  | BY | 15 | 34977   | 191977  | 0.88 |
| 7  | 3S | 3  | 132313  | 219813  | 0.98 |
| 7  | 3S | 5  | 1435    | 70235   | 0.99 |
| 7  | 3S | 9  | 366656  | 418556  | 0.87 |
| 7  | 3S | 11 | 119772  | 366972  | 0.88 |
| 7  | 3S | 13 | 552176  | 667676  | 0.96 |
| 7  | 3S | 14 | 373335  | 499935  | 0.91 |
| 7  | BY | 15 | 107986  | 215386  | 0.07 |
| 7  | 3S | 15 | 451598  | 689798  | 0.92 |
| 8  | 3S | 3  | 112256  | 214056  | 0.99 |
| 8  | 3S | 5  | 28135   | 78135   | 1.00 |
| 8  | BY | 5  | 101481  | 271781  | 0.87 |
| 8  | BY | 5  | 286081  | 461781  | 0.99 |
| 8  | BY | 7  | 85900   | 234000  | 0.88 |
| 8  | 3S | 8  | 441     | 142341  | 0.07 |
| 8  | 3S | 9  | 383751  | 432851  | 0.95 |
| 8  | 3S | 10 | 299283  | 464883  | 0.99 |
| 8  | 3S | 13 | 25332   | 140232  | 0.83 |
| 8  | 3S | 13 | 545805  | 702505  | 0.98 |
| 8  | 3S | 15 | 82512   | 228312  | 0.92 |
| 8  | 3S | 15 | 486712  | 624312  | 0.84 |
| 9  | 3S | 3  | 97868   | 220168  | 0.99 |
| 9  | 3S | 5  | 6639    | 69839   | 0.98 |
| 9  | BY | 5  | 319074  | 470274  | 1.00 |
| 9  | BY | 9  | 320560  | 394160  | 0.99 |
| 9  | 3S | 9  | 395108  | 434008  | 0.99 |
| 9  | 3S | 13 | 511018  | 655418  | 0.94 |
| 9  | 3S | 15 | 126     | 197426  | 0.95 |
| 10 | 3S | 3  | 105083  | 218983  | 1.00 |
| 10 | BY | 4  | 1169284 | 1269984 | 0.92 |
| 10 | 3S | 5  | 4635    | 71335   | 0.99 |
| 10 | BY | 5  | 323425  | 456025  | 0.99 |
| 10 | BY | 9  | 317767  | 393767  | 1.00 |
| 10 | 3S | 9  | 395108  | 432108  | 0.98 |
| 10 | 3S | 11 | 94872   | 326772  | 0.86 |
| 10 | 3S | 13 | 584908  | 654908  | 0.92 |
| 10 | 3S | 15 | 95414   | 250914  | 0.98 |



|    |    |    |         |         |      |
|----|----|----|---------|---------|------|
| 11 | 3S | 3  | 69577   | 232977  | 1.00 |
| 11 | 3S | 5  | 1935    | 73635   | 1.00 |
| 11 | BY | 5  | 215722  | 472022  | 1.00 |
| 11 | BY | 7  | 124322  | 195022  | 0.81 |
| 11 | BY | 9  | 313835  | 393935  | 1.00 |
| 11 | 3S | 9  | 394410  | 432610  | 1.00 |
| 11 | 3S | 13 | 492981  | 670681  | 0.93 |
| 11 | 3S | 14 | 319549  | 425249  | 0.92 |
| 11 | 3S | 15 | 496529  | 724429  | 0.85 |
| 12 | 3S | 3  | 92477   | 207077  | 0.99 |
| 12 | 3S | 5  | 6539    | 57439   | 0.99 |
| 12 | BY | 5  | 308100  | 465000  | 0.98 |
| 12 | 3S | 7  | 932650  | 994350  | 0.89 |
| 12 | BY | 9  | 327892  | 393492  | 0.98 |
| 12 | 3S | 9  | 395543  | 438943  | 0.99 |
| 12 | BY | 12 | 708936  | 741736  | 0.81 |
| 12 | 3S | 13 | 531055  | 620455  | 0.92 |
| 12 | 3S | 14 | 363239  | 471839  | 0.83 |
| 12 | 3S | 15 | 317537  | 744837  | 0.89 |
| 13 | 3S | 3  | 137844  | 219644  | 0.99 |
| 13 | BY | 4  | 1140684 | 1259184 | 0.95 |
| 13 | 3S | 5  | 6535    | 76835   | 1.00 |
| 13 | BY | 5  | 326731  | 462131  | 0.99 |
| 13 | 3S | 8  | 5198    | 123698  | 0.20 |
| 13 | BY | 9  | 344049  | 394149  | 0.99 |
| 13 | 3S | 9  | 395108  | 432208  | 0.99 |
| 13 | 3S | 13 | 518383  | 691383  | 0.94 |
| 13 | 3S | 15 | 113329  | 195529  | 0.91 |
| 13 | 3S | 15 | 465529  | 548929  | 0.84 |
| 14 | 3S | 3  | 111173  | 217873  | 0.98 |
| 14 | 3S | 5  | 1435    | 62835   | 1.00 |
| 14 | BY | 5  | 153019  | 226919  | 0.81 |
| 14 | BY | 5  | 193362  | 272662  | 0.83 |
| 14 | BY | 5  | 285062  | 467062  | 1.00 |
| 14 | BY | 5  | 337672  | 413672  | 0.98 |
| 14 | BY | 7  | 87383   | 142783  | 0.78 |
| 14 | BY | 7  | 100573  | 195573  | 0.85 |
| 14 | 3S | 7  | 961406  | 1001106 | 0.80 |
| 14 | 3S | 9  | 361620  | 432620  | 0.99 |
| 14 | 3S | 13 | 514075  | 735675  | 0.99 |
| 14 | 3S | 14 | 415078  | 483578  | 0.85 |

|    |    |    |         |         |      |
|----|----|----|---------|---------|------|
| 14 | 3S | 15 | 49129   | 227029  | 0.93 |
| 14 | BY | 15 | 981009  | 1057509 | 0.99 |
| 15 | 3S | 3  | 91977   | 211777  | 0.99 |
| 15 | BY | 4  | 962405  | 999505  | 0.80 |
| 15 | 3S | 5  | 5335    | 72735   | 1.00 |
| 15 | BY | 5  | 139920  | 410720  | 0.99 |
| 15 | BY | 7  | 68009   | 257109  | 0.87 |
| 15 | BY | 10 | 394723  | 462323  | 0.81 |
| 15 | 3S | 13 | 544486  | 684186  | 0.98 |
| 15 | 3S | 14 | 374874  | 497074  | 0.90 |
| 15 | 3S | 15 | 451405  | 713805  | 1.00 |
| 16 | 3S | 3  | 100677  | 219177  | 0.99 |
| 16 | 3S | 5  | 6639    | 43939   | 1.00 |
| 16 | BY | 5  | 143401  | 301901  | 0.95 |
| 16 | BY | 5  | 363002  | 457002  | 0.99 |
| 16 | BY | 7  | 99973   | 191773  | 0.88 |
| 16 | 3S | 11 | 79889   | 366889  | 0.86 |
| 16 | 3S | 13 | 567537  | 688837  | 1.00 |
| 16 | 3S | 14 | 344174  | 524474  | 0.96 |
| 16 | 3S | 15 | 126     | 221726  | 1.00 |
| 16 | 3S | 15 | 449982  | 664382  | 1.00 |
| 17 | 3S | 3  | 96650   | 211250  | 1.00 |
| 17 | BY | 4  | 1055912 | 1150512 | 0.93 |
| 17 | BY | 4  | 1169012 | 1240512 | 1.00 |
| 17 | 3S | 5  | 6535    | 68135   | 1.00 |
| 17 | BY | 5  | 197225  | 297825  | 0.89 |
| 17 | BY | 5  | 323125  | 420925  | 1.00 |
| 17 | BY | 7  | 81340   | 142540  | 0.93 |
| 17 | 3S | 8  | 59041   | 154741  | 0.07 |
| 17 | 3S | 11 | 122072  | 372272  | 0.95 |
| 17 | BY | 12 | 643938  | 729338  | 0.93 |
| 17 | 3S | 13 | 538573  | 681373  | 0.99 |
| 17 | 3S | 14 | 374177  | 482077  | 0.94 |
| 17 | 3S | 15 | 141726  | 218926  | 1.00 |
| 17 | 3S | 15 | 491269  | 659569  | 0.96 |

**Supplementary Table 3. Loci detected in control backcross pools.** Start and stop positions were called as the 90% confidence interval around the point of maximum significance. Allele frequencies were calculated as the maximum within a 25-SNP window within a locus.

| Segregant | Cross | Chromosome | Start   | Stop    | Frequency |
|-----------|-------|------------|---------|---------|-----------|
| 2         | 3S    | 3          | 175351  | 222251  | 0.99      |
| 2         | 3S    | 5          | 6539    | 99439   | 1.00      |
| 2         | BY    | 13         | 25470   | 83870   | 0.80      |
| 3         | 3S    | 3          | 95839   | 221139  | 0.99      |
| 3         | 3S    | 5          | 4935    | 352535  | 1.00      |
| 3         | 3S    | 16         | 451372  | 522072  | 0.85      |
| 4         | 3S    | 3          | 91477   | 228777  | 0.99      |
| 4         | BY    | 4          | 1172722 | 1238422 | 0.82      |
| 4         | 3S    | 5          | 1335    | 79335   | 0.99      |
| 4         | 3S    | 14         | 319549  | 465949  | 0.97      |
| 5         | 3S    | 3          | 90277   | 226577  | 0.99      |
| 5         | 3S    | 3          | 157990  | 222790  | 0.99      |
| 5         | BY    | 4          | 1095315 | 1264915 | 0.88      |
| 5         | 3S    | 5          | 6539    | 64439   | 0.99      |
| 5         | 3S    | 5          | 6539    | 64439   | 0.99      |
| 5         | 3S    | 14         | 312304  | 464204  | 0.98      |
| 5         | 3S    | 14         | 343473  | 427173  | 0.93      |
| 6         | 3S    | 3          | 105147  | 204847  | 0.97      |
| 6         | 3S    | 5          | 6539    | 89039   | 0.94      |
| 6         | 3S    | 14         | 324739  | 430039  | 0.91      |
| 7         | 3S    | 3          | 92213   | 221213  | 0.99      |
| 7         | 3S    | 5          | 1335    | 83635   | 0.99      |
| 7         | 3S    | 14         | 336535  | 428935  | 0.93      |
| 8         | 3S    | 3          | 70256   | 214056  | 1.00      |
| 8         | 3S    | 5          | 26335   | 97935   | 1.00      |
| 8         | 3S    | 14         | 354444  | 427244  | 0.95      |
| 9         | 3S    | 3          | 91468   | 220668  | 0.99      |
| 9         | 3S    | 4          | 127296  | 538696  | 0.83      |
| 9         | 3S    | 5          | 25139   | 78039   | 0.98      |
| 9         | 3S    | 14         | 341751  | 430651  | 0.93      |
| 10        | 3S    | 3          | 74057   | 218957  | 0.96      |
| 10        | BY    | 4          | 1097984 | 1254184 | 0.86      |
| 10        | 3S    | 5          | 1335    | 117535  | 0.97      |
| 10        | 3S    | 14         | 312239  | 445239  | 0.93      |
| 11        | 3S    | 3          | 93677   | 219177  | 0.99      |

|    |    |    |         |         |      |
|----|----|----|---------|---------|------|
| 11 | 3S | 5  | 1435    | 90435   | 1.00 |
| 11 | 3S | 14 | 319649  | 441049  | 0.93 |
| 12 | 3S | 3  | 91077   | 207077  | 0.99 |
| 12 | BY | 4  | 1091855 | 1221755 | 0.81 |
| 12 | 3S | 5  | 6539    | 57439   | 1.00 |
| 12 | 3S | 14 | 337139  | 441539  | 0.92 |
| 13 | 3S | 3  | 92244   | 222244  | 0.99 |
| 13 | BY | 4  | 1171184 | 1255684 | 0.84 |
| 13 | 3S | 5  | 1435    | 80735   | 1.00 |
| 14 | 3S | 3  | 92073   | 222673  | 1.00 |
| 14 | BY | 4  | 1084535 | 1246235 | 0.82 |
| 14 | 3S | 5  | 1435    | 59235   | 1.00 |
| 15 | 3S | 3  | 91157   | 211857  | 0.99 |
| 15 | 3S | 5  | 2835    | 78635   | 0.99 |
| 15 | 3S | 14 | 313274  | 421374  | 0.95 |
| 15 | BY | 15 | 12077   | 98977   | 0.96 |
| 16 | 3S | 3  | 100577  | 215577  | 0.99 |
| 16 | BY | 4  | 1095215 | 1220415 | 0.85 |
| 16 | 3S | 5  | 6539    | 43939   | 1.00 |
| 16 | 3S | 14 | 313274  | 424574  | 0.95 |
| 17 | 3S | 3  | 104933  | 212933  | 0.99 |
| 17 | BY | 4  | 1172876 | 1214876 | 0.90 |
| 17 | 3S | 5  | 6635    | 73435   | 1.00 |
| 17 | 3S | 14 | 355180  | 412980  | 0.97 |

**Supplementary Table 4. Predominant genotypes in mapping populations derived from each rough segregant.**

| Segregant | # loci detected | Predominant genotype                                                                                                                                                                                                                                                   |
|-----------|-----------------|------------------------------------------------------------------------------------------------------------------------------------------------------------------------------------------------------------------------------------------------------------------------|
| 1         | 2               | <i>FLO8</i> <sup>3S</sup> <i>SSN8</i> <sup>mut</sup>                                                                                                                                                                                                                   |
| 2         | 3               | <i>FLO8</i> <sup>3S</sup> <i>MSS11</i> <sup>BY</sup> <i>SSN8</i> <sup>mut</sup>                                                                                                                                                                                        |
| 3         | 4               | <i>TRR1</i> <sup>3S</sup> <i>FLO8</i> <sup>3S</sup> <i>END3</i> <sup>3S</sup> <i>SSN3</i> <sup>mut</sup>                                                                                                                                                               |
| 4         | 5               | <i>FLO8</i> <sup>3S</sup> <i>MSS11</i> <sup>BY</sup> <i>END3</i> <sup>BY</sup> <i>IRA2</i> <sup>mut</sup> <i>SFL1</i> <sup>BY</sup>                                                                                                                                    |
| 5         | 5               | <i>IRA1</i> <sup>mut</sup> <i>FLO8</i> <sup>3S</sup> <i>XII-1</i> <sup>BY</sup> <i>MSS11</i> <sup>BY</sup> <i>END3</i> <sup>BY</sup>                                                                                                                                   |
| 6         | 6               | <i>IRA1</i> <sup>mut</sup> <i>FLO8</i> <sup>3S</sup> <i>XII-2</i> <sup>3S</sup> <i>MSS11</i> <sup>BY</sup> <i>END3</i> <sup>BY</sup> <i>IRA2</i> <sup>3S</sup>                                                                                                         |
| 7         | 10              | <i>GPA2</i> <sup>3S</sup> <i>FLO8</i> <sup>3S</sup> <i>MDS3</i> <sup>3S</sup> <i>FLO11</i> <sup>BY</sup> <i>TPK3</i> <sup>BY</sup> <i>MSS11</i> <sup>BY</sup> <i>END3</i> <sup>BY</sup> <i>IRA2</i> <sup>BY</sup> <i>SFL1</i> <sup>BY</sup> <i>GPB1</i> <sup>mut</sup> |
| 8         | 10              | <i>GPA2</i> <sup>3S</sup> <i>FLO8</i> <sup>3S</sup> <i>MDS3</i> <sup>3S</sup> <i>VIII</i> <sup>3S</sup> <i>FLO11</i> <sup>BY</sup> <i>IRC8</i> <sup>mut</sup> <i>XIII</i> <sup>BY</sup> <i>MSS11</i> <sup>BY</sup> <i>IRA2</i> <sup>BY</sup> <i>SFL1</i> <sup>BY</sup> |
| 9         | 5               | <i>FLO8</i> <sup>3S</sup> <i>FLO11</i> <sup>3S</sup> <i>FLO11</i> <sup>BY</sup> <i>MSS11</i> <sup>BY</sup> <i>IRA2</i> <sup>BY</sup>                                                                                                                                   |
| 10        | 6               | <i>FLO8</i> <sup>3S</sup> <i>FLO11</i> <sup>3S</sup> <i>FLO11</i> <sup>BY</sup> <i>TPK3</i> <sup>BY</sup> <i>MSS11</i> <sup>BY</sup> <i>IRA2</i> <sup>BY</sup>                                                                                                         |
| 11        | 7               | <i>GPA2</i> <sup>3S</sup> <i>FLO8</i> <sup>3S</sup> <i>MDS3</i> <sup>3S</sup> <i>FLO11</i> <sup>3S</sup> <i>FLO11</i> <sup>BY</sup> <i>MSS11</i> <sup>BY</sup> <i>SFL1</i> <sup>BY</sup>                                                                               |
| 12        | 8               | <i>FLO8</i> <sup>3S</sup> <i>MGA1</i> <sup>BY</sup> <i>FLO11</i> <sup>3S</sup> <i>FLO11</i> <sup>BY</sup> <i>XII-2</i> <sup>3S</sup> <i>MSS11</i> <sup>BY</sup> <i>END3</i> <sup>BY</sup> <i>SFL1</i> <sup>BY</sup>                                                    |
| 13        | 7               | <i>FLO8</i> <sup>3S</sup> <i>VIII</i> <sup>3S</sup> <i>FLO11</i> <sup>3S</sup> <i>FLO11</i> <sup>BY</sup> <i>MSS11</i> <sup>BY</sup> <i>IRA2</i> <sup>BY</sup> <i>SFL1</i> <sup>BY</sup>                                                                               |
| 14        | 9               | <i>GPA2</i> <sup>3S</sup> <i>FLO8</i> <sup>3S</sup> <i>MDS3</i> <sup>3S</sup> <i>MGA1</i> <sup>BY</sup> <i>FLO11</i> <sup>3S</sup> <i>FLO11</i> <sup>BY</sup> <i>MSS11</i> <sup>BY</sup> <i>END3</i> <sup>BY</sup> <i>IRA2</i> <sup>BY</sup>                           |
| 15        | 8               | <i>IV</i> <sup>3S</sup> <i>GPA2</i> <sup>3S</sup> <i>FLO8</i> <sup>3S</sup> <i>MDS3</i> <sup>3S</sup> <i>X</i> <sup>3S</sup> <i>MSS11</i> <sup>BY</sup> <i>END3</i> <sup>BY</sup> <i>SFL1</i> <sup>BY</sup>                                                            |
| 16        | 8               | <i>GPA2</i> <sup>3S</sup> <i>FLO8</i> <sup>3S</sup> <i>MDS3</i> <sup>3S</sup> <i>TPK3</i> <sup>BY</sup> <i>MSS11</i> <sup>BY</sup> <i>END3</i> <sup>BY</sup> <i>IRA2</i> <sup>BY</sup> <i>SFL1</i> <sup>BY</sup>                                                       |
| 17        | 10              | <i>GPA2</i> <sup>3S</sup> <i>FLO8</i> <sup>3S</sup> <i>MDS3</i> <sup>3S</sup> <i>VIII</i> <sup>3S</sup> <i>TPK3</i> <sup>BY</sup> <i>XII-2</i> <sup>3S</sup> <i>MSS11</i> <sup>BY</sup> <i>END3</i> <sup>BY</sup> <i>IRA2</i> <sup>BY</sup> <i>SFL1</i> <sup>BY</sup>  |

**Supplementary Table 5. Information regarding causal *de novo* mutations.**

Functional consequences were assessed by deleting the mutant allele from the rough segregant carrying a given lesion. The *IRA2* mutation with an asterisk refers to the one identified in Taylor et al. 2014. *PLOS Genetics*.

| Mutant gene  | Function of gene                                                    | Lesion                                 | Functional consequence   | Impact on gene sequence                                                                                                           |
|--------------|---------------------------------------------------------------------|----------------------------------------|--------------------------|-----------------------------------------------------------------------------------------------------------------------------------|
| <i>GPB1</i>  | Multistep regulator of cAMP-PKA signaling                           | Single nucleotide mutation<br>2109G->T | Partial loss-of-function | Changes Leucine to Phenylalanine at codon 703. May disrupt Kelch domain <sup>1</sup>                                              |
| <i>IRA1</i>  | GTPase-activating protein; negatively regulates Ras                 | Single base deletion<br>1160ΔG         | Null                     | Nonsense; Loss of Gpb2 binding site and GAP-related domain; Truncates 2694 amino acids, 87% of protein                            |
| <i>IRA1</i>  | GTPase-activating protein; negatively regulates Ras                 | Single base deletion<br>7719ΔG         | Null                     | Nonsense; Loss of Gpb2 binding site and disruption of GAP-related domain <sup>2</sup> ; Truncates 503 amino acids, 16% of protein |
| <i>IRA2</i>  | GTPase-activating protein; negatively regulates Ras                 | Single nucleotide mutation<br>-60C->T  | Null                     | Likely disrupts Tbp binding site <sup>3</sup>                                                                                     |
| <i>IRA2*</i> | GTPase-activating protein; negatively regulates Ras                 | Single base deletion<br>8801ΔA         | Partial loss-of-function | Nonsense; Loss of Gpb1 binding site <sup>2</sup> ; Truncates 117 amino acids, 4% of protein                                       |
| <i>IRC8</i>  | Bud tip localized protein                                           | Single base deletion<br>938ΔA          | Null                     | Nonsense; Truncates 487 amino acids, 59% of protein                                                                               |
| <i>SSN3</i>  | Cyclin-dependent protein kinase; component of RNA pol II holoenzyme | Single base deletion<br>111ΔT          | Null                     | Nonsense; Truncates 508 amino acids, 92% of protein                                                                               |
| <i>SSN8</i>  | Cyclin-like component of RNA polymerase II holoenzyme               | 22 base deletion<br>40Δ22              | Null                     | Nonsense; Loss of cyclin box domain <sup>4</sup> ; Truncates 291 amino acids, 90% of protein                                      |

**Supplementary Table 6. SRA accession numbers for each pooled sequencing experiment.**

|                     |              |
|---------------------|--------------|
| RS1xBY4716          | SAMN04126845 |
| RS1x322134S         | SAMN04126846 |
| RS2xBY4716          | SAMN04126847 |
| RS2x322134S         | SAMN04126848 |
| RS3xBY4716          | SAMN04126849 |
| RS3x322134S         | SAMN04126850 |
| RS4xBY4716          | SAMN04126851 |
| RS4x322134S         | SAMN04126852 |
| RS5xBY4716          | SAMN04126853 |
| RS5x322134S         | SAMN04126854 |
| RS6xBY4716          | SAMN04126855 |
| RS6x322134S         | SAMN04126856 |
| RS7xBY4716          | SAMN04126857 |
| RS7x322134S         | SAMN04126858 |
| RS8xBY4716          | SAMN04126859 |
| RS8x322134S         | SAMN04126860 |
| RS9xBY4716          | SAMN04126861 |
| RS9x322134S         | SAMN04126862 |
| RS10xBY4716         | SAMN04126863 |
| RS10x322134S        | SAMN04126864 |
| RS11xBY4716         | SAMN04126865 |
| RS11x322134S        | SAMN04126866 |
| RS12xBY4716         | SAMN04126867 |
| RS12x322134S        | SAMN04126868 |
| RS13xBY4716         | SAMN04126869 |
| RS13x322134S        | SAMN04126870 |
| RS14xBY4716         | SAMN04126871 |
| RS14x322134S        | SAMN04126872 |
| RS15xBY4716         | SAMN04126873 |
| RS15x322134S        | SAMN04126874 |
| RS16xBY4716         | SAMN04126875 |
| RS16x322134S        | SAMN04126876 |
| RS17xBY4716         | SAMN04126877 |
| RS17x322134S        | SAMN04126878 |
| RS1xBY4716_control  | SAMN04126879 |
| RS1x322134S_control | SAMN04126880 |
| RS2xBY4716_control  | SAMN04126881 |
| RS2x322134S_control | SAMN04126882 |
| RS3xBY4716_control  | SAMN04126883 |

|                      |              |
|----------------------|--------------|
| RS3x322134S_control  | SAMN04126884 |
| RS4xBY4716_control   | SAMN04126885 |
| RS4x322134S_control  | SAMN04126886 |
| RS5xBY4716_control   | SAMN04126887 |
| RS5x322134S_control  | SAMN04126888 |
| RS6xBY4716_control   | SAMN04126889 |
| RS6x322134S_control  | SAMN04126890 |
| RS7xBY4716_control   | SAMN04126891 |
| RS7x322134S_control  | SAMN04126892 |
| RS8xBY4716_control   | SAMN04126893 |
| RS8x322134S_control  | SAMN04126894 |
| RS9xBY4716_control   | SAMN04126895 |
| RS9x322134S_control  | SAMN04126896 |
| RS10xBY4716_control  | SAMN04126897 |
| RS10x322134S_control | SAMN04126898 |
| RS11xBY4716_control  | SAMN04126899 |
| RS11x322134S_control | SAMN04126900 |
| RS12xBY4716_control  | SAMN04126901 |
| RS12x322134S_control | SAMN04126902 |
| RS13xBY4716_control  | SAMN04126903 |
| RS13x322134S_control | SAMN04126904 |
| RS14xBY4716_control  | SAMN04126905 |
| RS14x322134S_control | SAMN04126906 |
| RS15xBY4716_control  | SAMN04126907 |
| RS15x322134S_control | SAMN04126908 |
| RS16xBY4716_control  | SAMN04126909 |
| RS16x322134S_control | SAMN04126910 |
| RS17xBY4716_control  | SAMN04126911 |
| RS17x322134S_control | SAMN04126912 |



**Supplementary Table 7. Primers used in this study.** For marked replacements, a gene of interest is amplified using primers GENE\_mark1 and GENE\_mark2. An MX cassette is amplified using primers universal3 and GENE\_mark4. These amplicons are mixed together and transformed into a strain of interest. The two cassettes are joined by homologous recombination and replace the gene of interest, leaving behind a selectable MX cassette marker. Every mark2 primer begins with the sequence TAAATGTACGGGCGACAGTCACATCATGCCCCTGAGCTGCGCACGTCAAGACTGTCAAGG, which is homologous to all MX cassettes and allows for a recombination between the gene cassette and the MX cassette. Every mark4 primer ends with the sequence CGCACTTAACTTCGCATCTG, which allows for the amplification of an MX cassette.

The following primers can be used to generate allele swap strain using 'marked allele replacement', as in Matsui et al. 2015. *Genetics*. doi: 10.1534/genetics.115.180661.

|                      |                                                                                    |
|----------------------|------------------------------------------------------------------------------------|
| universal 3          | CCTTGACAGTCTTGACGTGC                                                               |
| FLO11_coding_mark1   | TCGCTTATTTGGTCCTTTTCG                                                              |
| FLO11_coding_mark2   | TAAATGTACGGGCGACAGTCACATCATGCCCTGAGCTGCGCACGTCAAGACTGTCAAGGTTGCCAATGTATGAGAGTGG    |
| FLO11_coding_mark4   | CGTGTAATCAAGTATGTCATTTTCAGGAACTTCTCAATTCTTGGCGTACTATATTGAGCGCACTTAACTTCGCATCTG     |
| FLO11_promoter_mark1 | TGCGTATATGGATTTTTGAGG                                                              |
| FLO11_promoter_mark2 | TAAATGTACGGGCGACAGTCACATCATGCCCTGAGCTGCGCACGTCAAGACTGTCAAGG GCAGATGCAAACA AAAAGCA  |
| FLO11_promoter_mark4 | CACCACCACGATCGGAGAAGCGCTATTAGTAGCAATGGCTAAGCCTTGCCAGAACATGTAA CGCACTTAACTTCGCATCTG |
| GBP1_mark1           | CCGTACCAATTCTTCTACAT                                                               |
| GBP1_mark2           | TAAATGTACGGGCGACAGTCACATCATGCCCTGAGCTGCGCACGTCAAGACTGTCAAGGCCCGCGGAATTAATTAGTT     |
| GBP1_mark4           | GAAAAAATTTTCTCGTTTTCTTTAGTCACTCTTGTACATAAGGATTATCCGAACCCCGCGCACTTAACTTCGCATCTG     |
| GPA2_mark1           | AAGATATACCATATATTACG                                                               |
| GPA2_mark2           | TAAATGTACGGGCGACAGTCACATCATGCCCTGAGCTGCGCACGTCAAGACTGTCAAGGAACGGTTGTGCTTAATACAG    |
| GPA2_mark4           | CGGGATAATAACTATAATGACTACAATAATATAGTGGTATAACGCTATAAATTAATAAATCGCACTTAACTTCGCATCTG   |

|            |                                                                                      |
|------------|--------------------------------------------------------------------------------------|
| IRA1_mark1 | GCCAATAAAATGATCAAAGG                                                                 |
| IRA1_mark2 | TAAATGTACGGGCGACAGTCACATCATGCCCTGAGCTGCGCACGTCAAGACTGTCAAGGAAAACGTATATAAT<br>CACTGC  |
| IRA1_mark4 | AAAACAAAATATAATTATAAGGAAAAACGTATATAATCACTGCAATACTCTAATTTAAAACGCACTTAACTTCGCAT<br>CTG |
| IRA2_mark1 | GGACATGCTTCTCCCTGAAG                                                                 |
| IRA2_mark2 | TAAATGTACGGGCGACAGTCACATCATGCCCTGAGCTGCGCACGTCAAGACTGTCAAGGTACCCTTGTAAGT<br>GTCATCC  |
| IRA2_mark4 | GCACAGATCCCAGAGAAAAGCAGGGAAACAAGAAAATAAGAAAACAAGAAAAACAGTAGTCGCACTTAACTTCG<br>CATCTG |
| IRC8_mark1 | GCAAAACGCACATACCCACA                                                                 |
| IRC8_mark2 | TAAATGTACGGGCGACAGTCACATCATGCCCTGAGCTGCGCACGTCAAGACTGTCAAGGATATGAATAAGTCG<br>GTTGGT  |
| IRC8_mark4 | ATCGTGTTCTACGGGATCAAATAGTTGCTTTTAGCAGTTCCCATAGGTATCTTTGATACCGCACTTAACTTCGC<br>ATCTG  |
| MDS3_mark1 | GTGGCTAAGGCAGACTCCGT                                                                 |
| MDS3_mark2 | TAAATGTACGGGCGACAGTCACATCATGCCCTGAGCTGCGCACGTCAAGACTGTCAAGGGTGCGAGTAACTA<br>TCCTGGG  |
| MDS3_mark4 | GGAAGCAATCCGTTTTGAGATGTATAGCAGCATATTCTTGGATTATTAAGAACTTTATATCGCACTTAACTTCGCA<br>TCTG |
| SSN3_mark1 | TGTGGCTTAAGTTGCGTTTC                                                                 |
| SSN3_mark2 | TAAATGTACGGGCGACAGTCACATCATGCCCTGAGCTGCGCACGTCAAGACTGTCAAGGCTATCTTCTGTTTT<br>TCTTTC  |

|                                                                                                                                                     |                                                                                       |
|-----------------------------------------------------------------------------------------------------------------------------------------------------|---------------------------------------------------------------------------------------|
| SSN3_mark4                                                                                                                                          | GAATATAATAGTGACAGTGCTGTGGAATGAAAAATTCCAAATATATATAAAAAATAGAAGCCGCACTTAACTTCGC<br>ATCTG |
| SSN8_mark1                                                                                                                                          | CTGAATCTCAAAAAGTTAGAC                                                                 |
| SSN8_mark2                                                                                                                                          | TAAATGTACGGGCGACAGTCACATCATGCCCTGAGCTGCGCACGTCAAGACTGTCAAGGGTTTTTAAATTTAT<br>TCTTCG   |
| SSN8_mark4                                                                                                                                          | GACGAAACATTTCCAAAACGGATCATCACCACCATAATGATTGAATTTACAGGCTTAACGCGCACTTAACTTCGC<br>ATCTG  |
| TPK3_mark1                                                                                                                                          | AGACACTTTGTGCAGTCGTC                                                                  |
| TPK3_mark2                                                                                                                                          | TAAATGTACGGGCGACAGTCACATCATGCCCTGAGCTGCGCACGTCAAGACTGTCAAGGATGGCGTATATGA<br>ATGCTCC   |
| TPK3_mark4                                                                                                                                          | GAAAAGTCCTAGATCACTTTGAACGTCCCAGTCTTCTGAGGACGCAAATGTAGTCACAATCGCACTTAACTTCGC<br>ATCTG  |
| The following primers can be used to amplify the CORE cassette (Storici et al. 2001. Nature Biotechnology. 19: 773-776) for targeted gene deletion. |                                                                                       |

|         |                                                                                        |
|---------|----------------------------------------------------------------------------------------|
| gpb1Δ_F | TTTCTCGTTTTCTTTAGTCACTCTTGTCACATAAGGATTATCCGAACCCCGCCCCGCGGGAGCTCGTTTTCGAC<br>ACTGG    |
| gpb1Δ_R | TGAGCCGACCTCCCTATATCGGCTACTTTAAGGCTTTCCGTACCAATTCTTCTACATAAGTCCTTACCATTAAGTT<br>GATC   |
| ira1Δ_F | TTAGGAGCACGACATTCTTGCCAGTATCATTGTTGCTAATCTTTTTCTCTCATAAATTGCTCCTTACCATTAAGTT<br>GATC   |
| ira1Δ_R | GTTAAGCTATTTAACGAAAGCGTATAAAGTCAAGTGATCATCTTTTGCCCTGCAAATAGAGAGCTCGTTTTCGAC<br>ACTGG   |
| ira2Δ_F | GCATATAGCATTGTCCTCTGTTATTCGTTTTGCTTTTCTCCTTTAGTGTTACTTTTCCCCAACGGAGCTCGTTTT<br>CGACTGG |
| ira2Δ_R | ATGTACATTCATGCTTACAGATAGATATTGATATTTCTTTCATTAGTTTATGTAACACCTTCCTTACCATTAAGTTG<br>ATC   |
| irc8Δ_F | CTTCTTACGTATCAGAACAAGAAAGCATTTCCAAAGTAATTGCATTTGCCCTTGAGCAGTGAGCTCGTTTTCGAC<br>ACTGG   |
| irc8Δ_R | TTAATGAAATAAATCGTGTTCTACGGGATCAAATAGTTGCTTTTAGCAGTTCCTTACCATTAAGTTGAT<br>C             |
| ssn3Δ_F | GAATATAATAGTGACAGTGCTGTGGAATGAAAAATTCAAATATATATAAAAAATAGAAGCTCCTTACCATTAAGTT<br>GATC   |
| ssn3Δ_R | AAAGGTTTATAGGAAAGAAAAAGGCGGAAGGGTATACTGAAGTTAGTAATTTTGCTTCCGAGCTCGTTTTCGAC<br>ACTGG    |
| ssn8Δ_F | ATCATCACCACCATAATGATTGAATTTACAGGCTTAACGGTTTTTAAATTTATTCTTCGCGAGCTCGTTTTCGACA<br>CTGG   |
| ssn8Δ_R | AAATGCCCTCTCAAACCTTTAGTTGAAGAGCGATAAGGCATCTGAATCTCAAAGTTAGACTCCTTACCATTAAGT<br>TGATC   |

**Supplementary Note 1. Aneuploidies and chromosomal rearrangements do not contribute to our current results.** To determine if aneuploidies caused rough morphology in any individuals, the average coverage of each chromosome was examined in the rough and control backcross pools. Only mapping populations descended from rough segregant 12 possessed an aneuploidy, which occurred on Chromosome I. 38 and 34% enrichment of this chromosome was observed relative to average genome-wide coverage in the BY and 3S backcrosses, respectively. However, similar enrichment in coverage for Chromosome I was seen in control pools descended from rough segregant 12, suggesting that the aneuploidy does not contribute to the rough phenotype. Furthermore, analyses aimed at identifying chromosomal rearrangements failed to identify any such events.

## Supplementary References

- 1 Phan, V. T. *et al.* The RasGAP proteins Ira2 and neurofibromin are negatively regulated by Gpb1 in yeast and ETEA in humans. *Mol Cell Biol* **30**, 2264-2279 (2010).
- 2 Harashima, T., Anderson, S., Yates, J. R., 3rd & Heitman, J. The kelch proteins Gpb1 and Gpb2 inhibit Ras activity via association with the yeast RasGAP neurofibromin homologs Ira1 and Ira2. *Mol Cell* **22**, 819-830 (2006).
- 3 Venters, B. J. *et al.* A comprehensive genomic binding map of gene and chromatin regulatory proteins in *Saccharomyces*. *Mol Cell* **41**, 480-492 (2011).
- 4 Kuchin, S., Yeghiayan, P. & Carlson, M. Cyclin-dependent protein kinase and cyclin homologs SSN3 and SSN8 contribute to transcriptional control in yeast. *Proc Natl Acad Sci U S A* **92**, 4006-4010 (1995).
